# Supplementary material for: Non-Celiac Gluten/Wheat Sensitivity: Clinical Characteristics and Microbiota and Mycobiota Composition by Response to the Gluten Challenge Test
Source: PubMed Central journal article supplement (PMC8070191; doi:10.3390/nu13041260), 2021-04-12

**Figure Supplementary 1. Microbiota and mycobiota  $\alpha$ -diversity by response to the DBPC gluten challenge test**

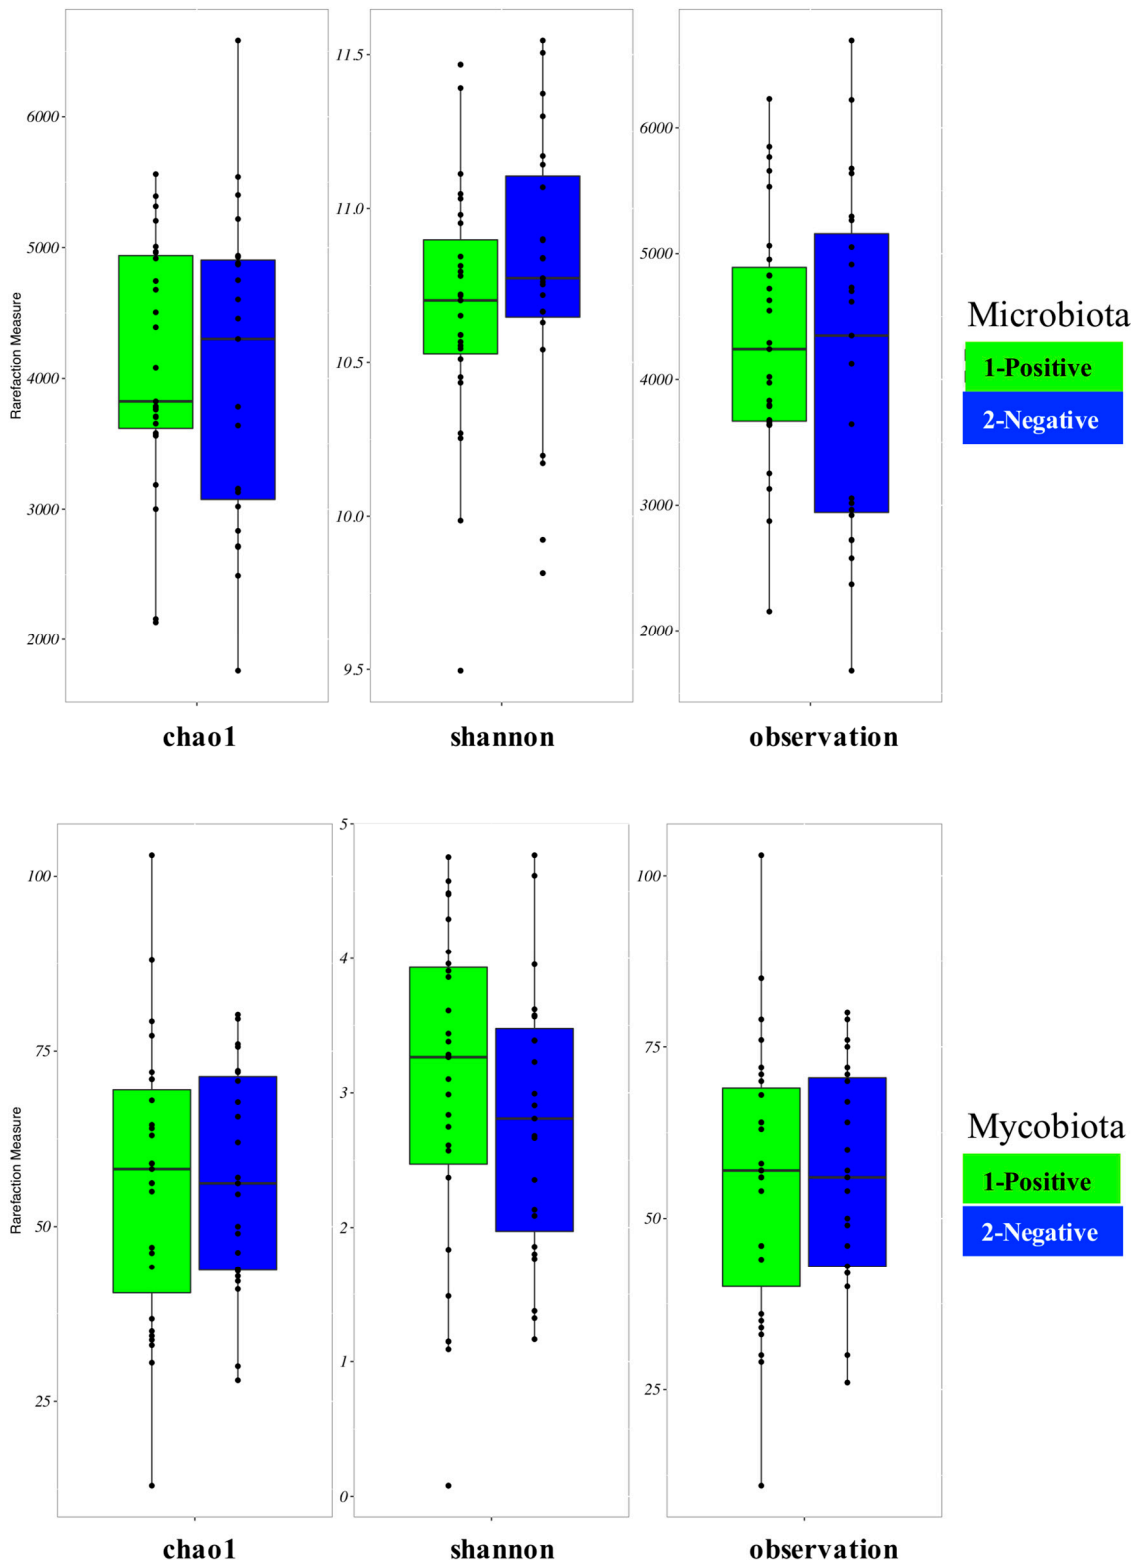

Supplement: nutrients-13-01260-s001.pdf [file nutrients-13-01260-s001.pdf]
